# Supplementary material for: Differences and Interactions in Placental Manganese and Iron Transfer across an In Vitro Model of Human Villous Trophoblasts
Source: MDPI journal article supplement (doi:10.3390/ijms23063296), 2022-03-18
Supplement: s1 [file s1]

## Supplementary data

### International Journal of Molecular Sciences – Special Issue: Metals and Cellular Redox and Immunity Status

#### **Differences and interactions in placental manganese and iron transfer across an *in vitro* model of human villous trophoblasts**

Vivien Michaelis<sup>1</sup>, Leonie Aengenheister<sup>2,3</sup>, Max Tuchenhagen<sup>4,5</sup>, Jörg Rinklebe<sup>6</sup>, Franziska Ebert<sup>5</sup>, Tanja Schwerdtle<sup>4,5,7</sup>, Tina Buerki-Thurnherr<sup>2</sup> and Julia Bornhorst<sup>1,4,\*</sup>

<sup>1</sup> Food Chemistry, Faculty of Mathematics and Natural Sciences, University of Wuppertal, Gaußstraße 20, 42119 Wuppertal

<sup>2</sup> Empa Swiss Federal Laboratories for Materials Science and Technology, Particles-Biology Interactions, Lerchenfeldstraße 5, 9014 St. Gallen, Switzerland

<sup>3</sup> Luxembourg Institute of Health, Rue Thomas Edison 1 A-B, 1445 Strassen, Luxembourg

<sup>4</sup> TraceAge-DFG Research Unit on Interactions of Essential Trace Elements in Healthy and Diseased Elderly (FOR 2558), Berlin-Potsdam-Jena-Wuppertal, 14558 Nuthetal, Germany

<sup>5</sup> Department of Food Chemistry, Institute of Nutritional Science, University of Potsdam, Arthur-Scheunert-Allee 114-116; 14558 Nuthetal, Germany

<sup>6</sup> Laboratory of Soil-, and Groundwater-Management, School of Architecture and Civil Engineering, Institute of Foundation Engineering, Water- and Waste-Management, University of Wuppertal, Pauluskirchstraße 7, 42285 Wuppertal, Germany

<sup>7</sup> German Federal Institute for Risk Assessment (BfR), Max-Dohrn-Straße 8-10, 10589 Berlin, Germany

\*Correspondance: bornhorst@uni-wuppertal.de

## Results

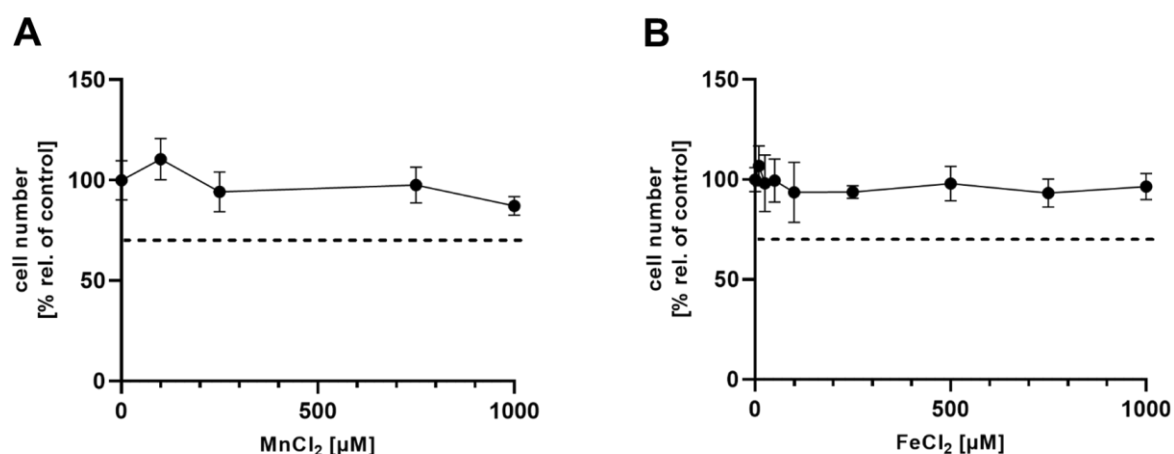

Figure S1: MnCl<sub>2</sub> (A) and FeCl<sub>2</sub> (B) cytotoxicity in confluent BeWo b30 cells after 24 h assessed using Hoechst Assay. Shown is the mean ± SD of three independent experiments.

Table S1: Bioavailability of MnCl<sub>2</sub> after 24 and 48 h in BeWo b30 cells. Data shows the mean  $\pm$  SD of at least three independent experiments with two replicates each.

| Incubated MnCl <sub>2</sub> [ $\mu$ M] | Mn bioavailability [pg/ $\mu$ g protein] |                   |
|----------------------------------------|------------------------------------------|-------------------|
|                                        | 24 h                                     | 48 h              |
| 0                                      | 29.2 $\pm$ 9.5                           | 63.4 $\pm$ 6.1    |
| 100                                    | 121.0 $\pm$ 33.7                         | 143.7 $\pm$ 48.9  |
| 500                                    | -                                        | 343.7 $\pm$ 50.9  |
| 750                                    | -                                        | 541.2 $\pm$ 130.8 |
| 1000                                   | -                                        | 705.0 $\pm$ 280.4 |

Table S2: Bioavailability of FeCl<sub>2</sub> after 48 h in BeWo b30 cells. Data shows the mean  $\pm$  SD of at least three independent experiments with two replicates each.

| Incubated FeCl <sub>2</sub> [ $\mu$ M] | Fe bioavailability [pg/ $\mu$ g protein] |
|----------------------------------------|------------------------------------------|
|                                        | 48 h                                     |
| 0                                      | 64.1 $\pm$ 12.0                          |
| 10                                     | 82.5 $\pm$ 23.4                          |
| 50                                     | 185.1 $\pm$ 67.2                         |
| 100                                    | 290.4 $\pm$ 29.4                         |
| 500                                    | 1092.6 $\pm$ 180.6                       |

Table S3: ICP-OES parameters.

| Parameter                  | Working conditions                |
|----------------------------|-----------------------------------|
| Plasma power [W]           | 1400                              |
| Cooling gas flow [L/min]   | 12.00                             |
| Auxiliary gas flow [L/min] | 1.00                              |
| Nebulizer flow [L/min]     | 1.00                              |
| Nebulizer type             | MicroMist®                        |
| Torch alignment            | Axial                             |
|                            | Basic settings: 0.2 mm horizontal |
|                            | 3.8 mm vertical                   |
|                            | 3.0 mm distance                   |
| Element wavelengths        | Mn: 257.611 / 259.373             |
|                            | Fe: 259.940 / 238.204             |
|                            | Cu: 324.754 / 224.700             |
|                            | Zn: 202.548 / 213.856             |

Table S4: ICP-MS/MS parameters.

| Parameter                      | Working conditions                                                                                                 |
|--------------------------------|--------------------------------------------------------------------------------------------------------------------|
| Plasma power [W]               | 1550                                                                                                               |
| Cooling gas flow [L/min]       | 15.00                                                                                                              |
| Auxiliary gas flow [L/min]     | 0.90                                                                                                               |
| Nebulizer flow [L/min]         | 1.00                                                                                                               |
| Nebulizer type                 | MicroMist®                                                                                                         |
| Spray chamber                  | Scott-type                                                                                                         |
| Spray chamber temperature [°C] | 2                                                                                                                  |
| Makeup Gas flow [L/min]        | 0.26                                                                                                               |
| Torch alignment                | Axial                                                                                                              |
| Gas mode                       | He (CRC-mode)                                                                                                      |
| He gas flow [mL/min]           | 3                                                                                                                  |
| Transitions                    | Mn: 55 → 55<br>Fe: 56 → 56<br>Cu: 63 → 63<br>Zn: 66 → 66<br>Internal Standard (IS)<br>Ge: 72 → 72<br>Rh: 103 → 103 |

Table S5: Primer sequences of human metal transport and storage-associated genes.

| Gene name                           | Association                  | Primer sequences (5' → 3')                                  | Amplicon length (bp) | Efficiency [%] |
|-------------------------------------|------------------------------|-------------------------------------------------------------|----------------------|----------------|
| <i>ACTB</i>                         | β-actin                      | Forw.: CATCCGCAAAGACCTGTACG<br>Rev.: TCTCCTTCTGCATCCTGTCG   | 86                   | 103.4          |
| <i>DMT1</i>                         | divalent metal transporter 1 | Forw.: AGTTGGCTATCATCGGCTCA<br>Rev.: TCTGCAATGGTGATGAGAACG  | 115                  | 106.8          |
| <i>TfR1</i>                         | transferrin receptor 1       | Forw.: TGAGAGGTACAACAGCCAACT<br>Rev.: CACGAGCAGAATACAGCCAC  | 107                  | 108.1          |
| <i>SLC40A1</i><br>( <i>FPN1</i> )   | ferroportin 1                | Forw.: TCGCCTAGTGTCATGACCAG<br>Rev.: TTGCAGAGGTCAGGTAGTCG   | 85                   | 104.6          |
| <i>SLC39A14</i><br>( <i>ZIP14</i> ) | zrt-, irt-related protein 14 | Forw.: CAGTCACCATGAAGCTGCTG<br>Rev.: GGTTCCTCCATAAGCCAAGCAG | 80                   | 113.3          |
| <i>MT1A</i>                         | metallothionein 1A           | Forw.: GCAAAGGGGCATCAGAGAAG<br>Rev.: TGGGTCAGGGTTGTATGGAA   | 119                  | 118.9          |
| <i>MT2A</i>                         | metallothionein 2A           | Forw.: GTTGCCTCCTCAGTGATCCT<br>Rev.: GGCGGCAGAGATGAGTACTA   | 77                   | 105.3          |
| <i>FTH1</i>                         | ferritin heavy chain 1       | Forw.: CATCAACCGCCAGATCAACC<br>Rev.: CACATCATCGCGGTCAAAGT   | 82                   | 111.7          |
| <i>FTL</i>                          | ferritin light chain         | Forw.: ATCTTCTCGGCCATCTCCTG<br>Rev.: TGGTTGGCAAGAAGGAGCTA   | 70                   | 103.2          |

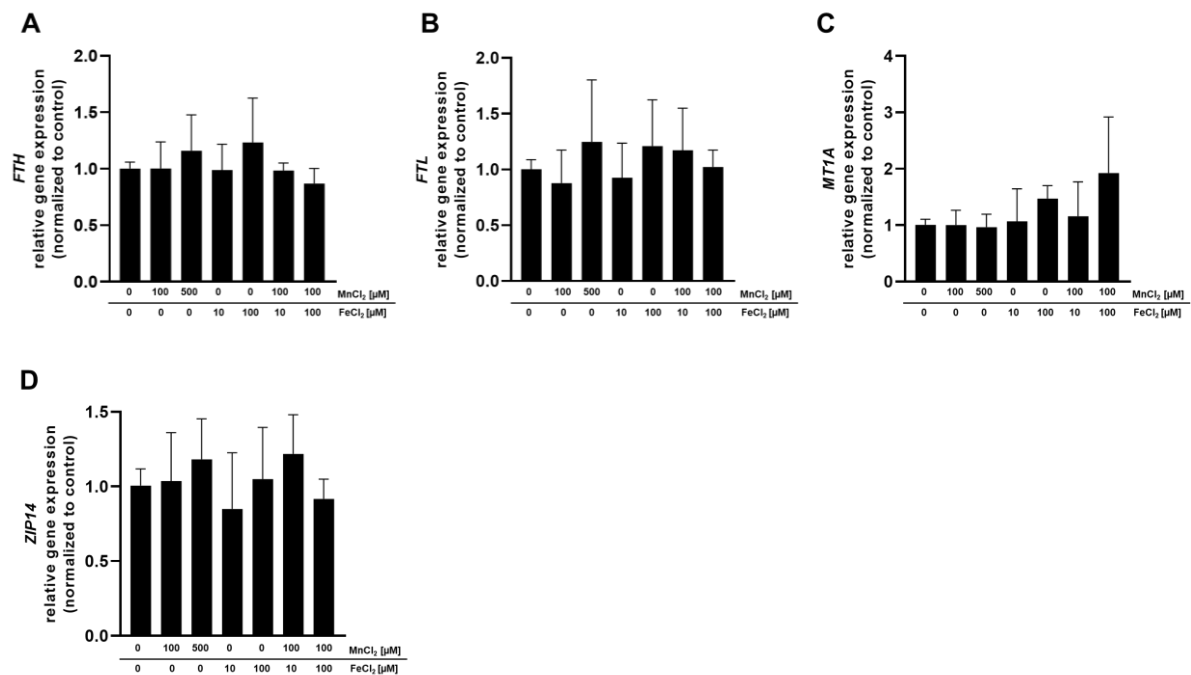

Figure S2: Relative mRNA levels of (A) *FTH*, (B) *FTL*, (C) *MT1A*, (D) *ZIP14*. Confluent BeWo b30 cells were incubated with MnCl<sub>2</sub> and/ or FeCl<sub>2</sub> for 24 h. Relative gene expression was determined using RT-qPCR and normalized to *ACTB* ( $\beta$ -actin) as housekeeping gene. Shown is the mean + SD of at least three biological replicates.

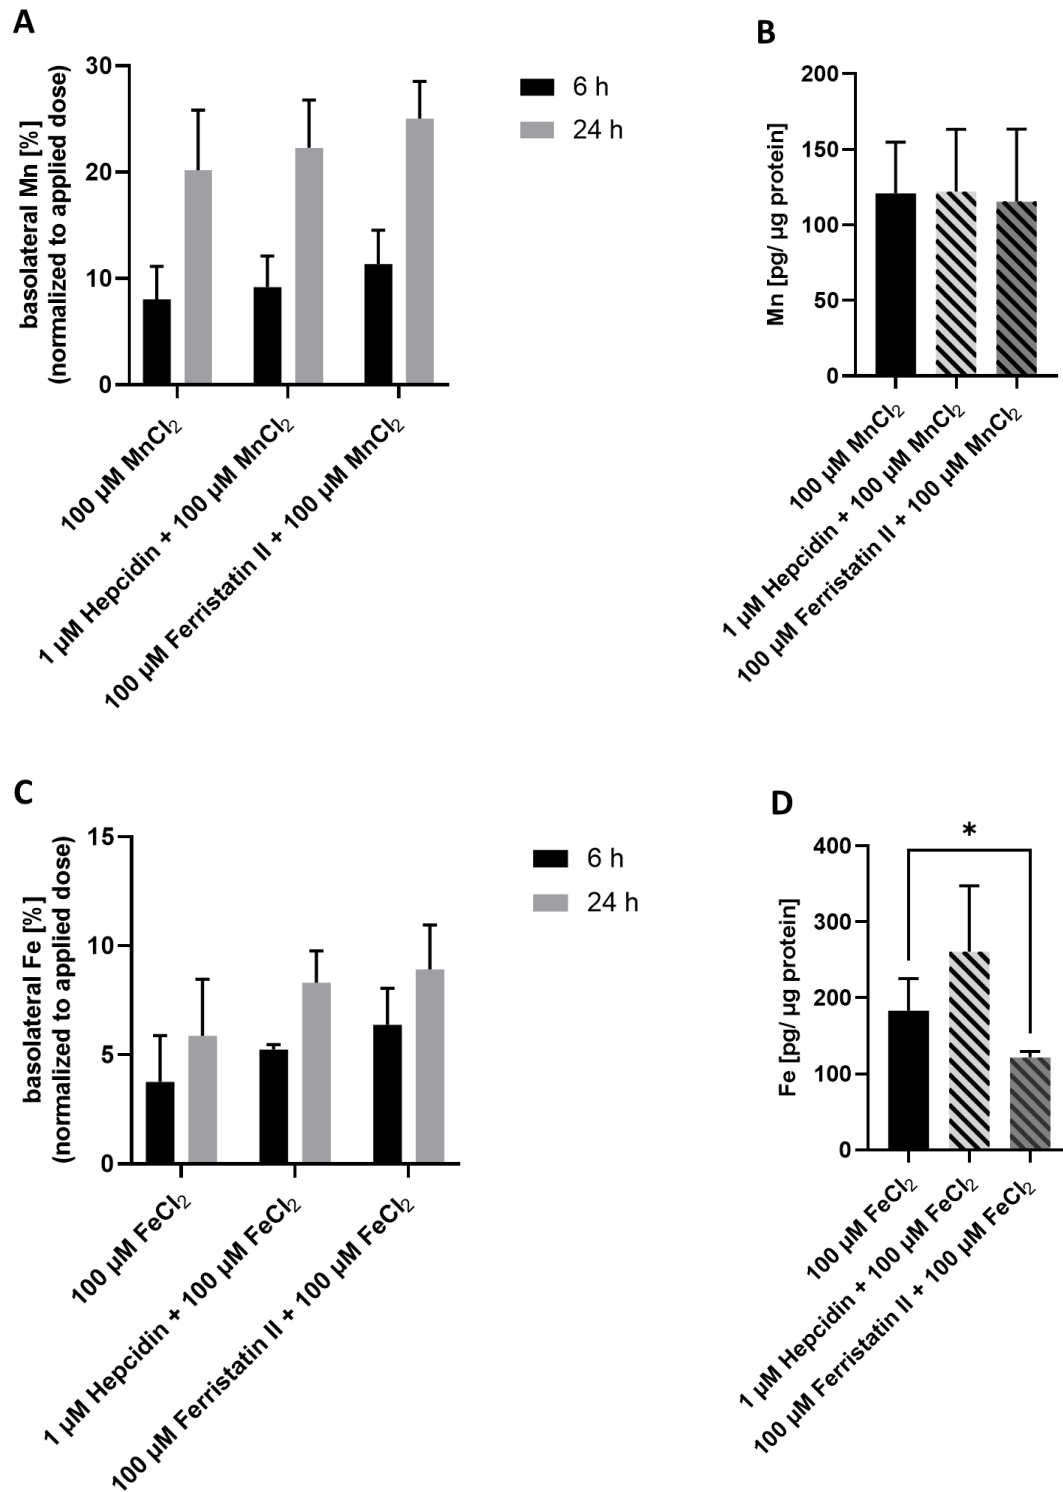

Figure S3: Basolateral (A) Mn or (C) Fe amount after 6 and 24 h and cellular (B) Mn or (D) Fe amount after 24 h of BeWo b30 cells incubated with inhibitors for DMT1 and TfR (Ferristatin II) and FPN (Hepcidin) in combination with MnCl<sub>2</sub> or FeCl<sub>2</sub>. Shown is the mean + SD of at least two independent experiments with two biological replicates each. Statistical analysis based on an unpaired t test with Welch's correction is depicted as followed: \*: compared to untreated control.
